# Supplementary material for: A toolset of constitutive promoters for metabolic engineering of Rhodosporidium toruloides
Source: PubMed Central journal article supplement (PMC6599526; doi:10.1186/s12934-019-1167-0), 2019-06-29

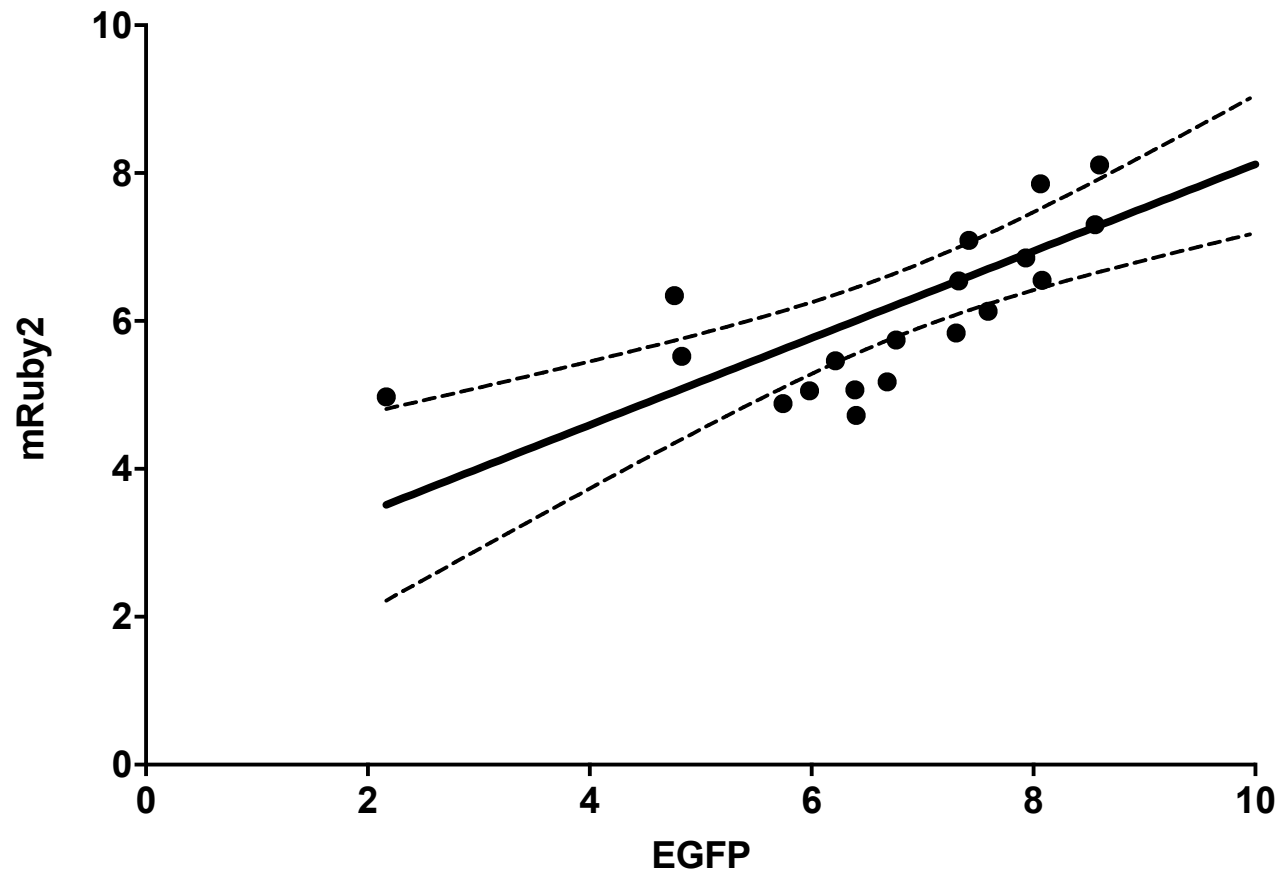

Supplement: 12934_2019_1167_MOESM4_ESM.pdf [file 12934_2019_1167_MOESM4_ESM.pdf]
